# Supplementary material
Source: Frontiers journal article supplement (https://www.frontiersin.org/articles/213771)
Supplement: Table_1.docx [file Table_1.docx]

Supplementary Material

Colony Diet Influences Ant Worker Foraging and Attendance of Myrmecophilous Lycaenid Caterpillars

Sebastian Pohl, Megan E. Frederickson, Mark A. Elgar*, Naomi E. Pierce

*** Correspondence:** Mark Elgar: [m.elgar@unimelb.edu.au](mailto:m.elgar@unimelb.edu.au)

# Supplementary Table

**Table S1.** Test statistics of the pairwise contrasts for the interaction between the categorical effects “diet” and “test solution”, from the generalized linear mixed model with consumption of the test solution as the target variable.

| **Diet** | **Pairwise contrasts** | **Contrast estimates** | **SE** | **t** | **df** | **Adjusted p** |
| --- | --- | --- | --- | --- | --- | --- |
| Protein | Sucrose + Serine — Sucrose | 0.077 | 0.222 | 0.348 | 350 | > 0.999 |
| Sucrose + Serine — Serine | 1.623 | 0.217 | 7.477 | 348 | < 0.001 |
| Sucrose + Serine — Water | 1.754 | 0.215 | 8.172 | 347 | < 0.001 |
| Sucrose — Serine | 1.546 | 0.213 | 7.264 | 347 | < 0.001 |
| Sucrose — Water | 1.677 | 0.222 | 7.549 | 351 | < 0.001 |
| Serine — Water | 0.130 | 0.216 | 0.602 | 349 | > 0.999 |
| Sugar | Sucrose + Serine — Sucrose | -0.099 | 0.215 | -0.459 | 347 | > 0.999 |
| Sucrose + Serine — Serine | -0.138 | 0.213 | -0.650 | 347 | > 0.999 |
| Sucrose + Serine — Water | -0.033 | 0.212 | -0.156 | 346 | > 0.999 |
| Sucrose — Serine | -0.040 | 0.215 | -0.185 | 348 | > 0.999 |
| Sucrose — Water | 0.065 | 0.213 | 0.307 | 347 | > 0.999 |
| Serine — Water | 0.105 | 0.211 | 0.499 | 346 | > 0.999 |
| Mixed | Sucrose + Serine — Sucrose | -0.063 | 0.213 | -0.295 | 348 | > 0.999 |
| Sucrose + Serine — Serine | -0.023 | 0.212 | -0.110 | 347 | > 0.999 |
| Sucrose + Serine — Water | -0.006 | 0.212 | -0.030 | 346 | > 0.999 |
| Sucrose — Serine | 0.039 | 0.218 | 0.181 | 350 | > 0.999 |
| Sucrose — Water | 0.056 | 0.214 | 0.264 | 347 | > 0.999 |
| Serine — Water | 0.017 | 0.215 | 0.079 | 348 | > 0.999 |
